# Supplementary material
Source: PubMed Central journal article supplement (PMC4560039)

Figure S1

**A**

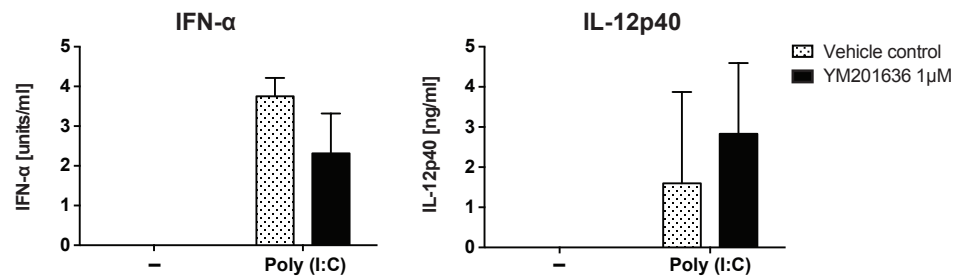

**B**

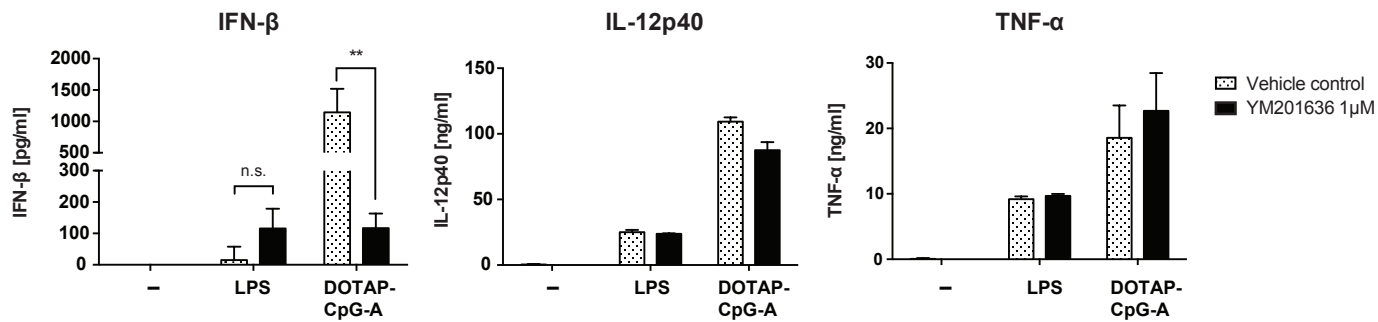

Figure S2

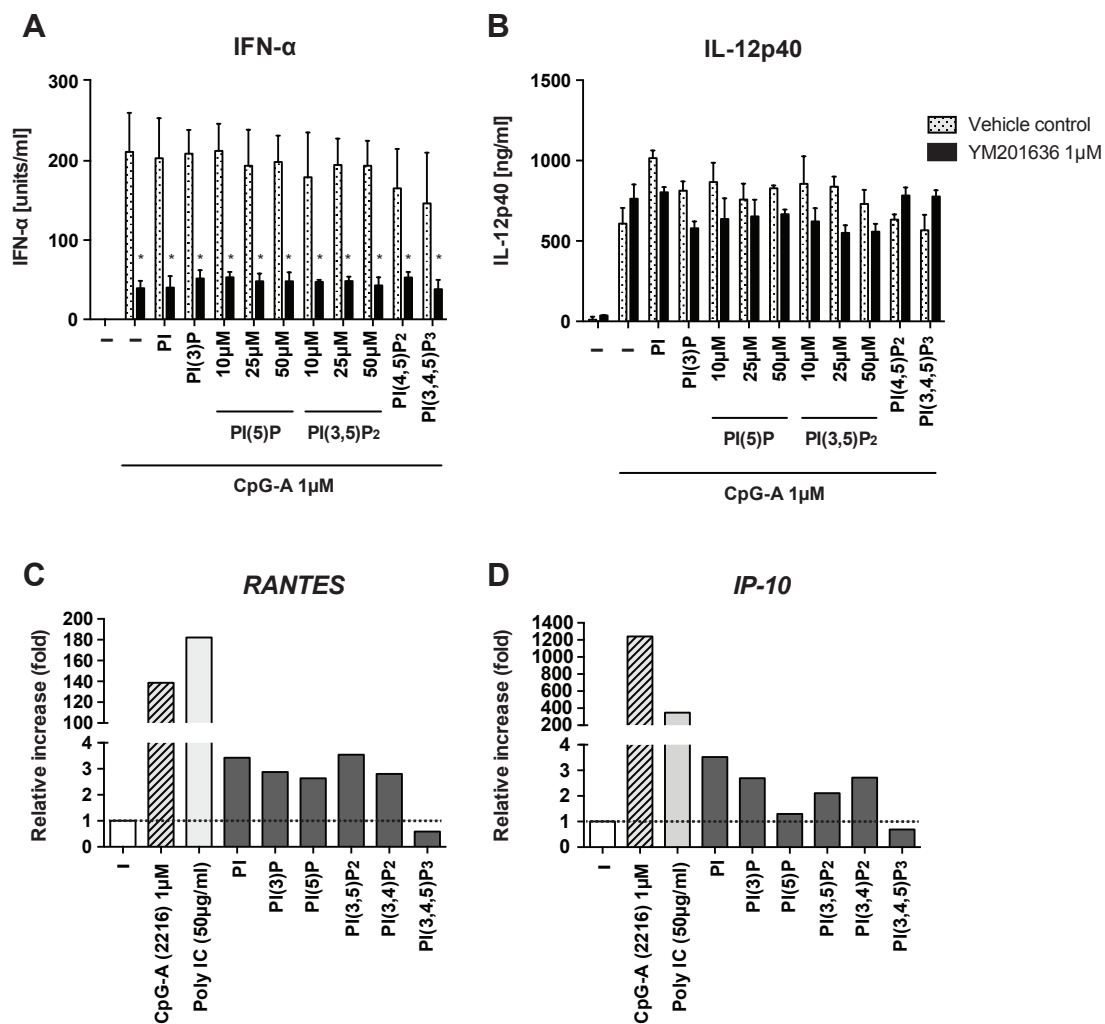

Figure S3

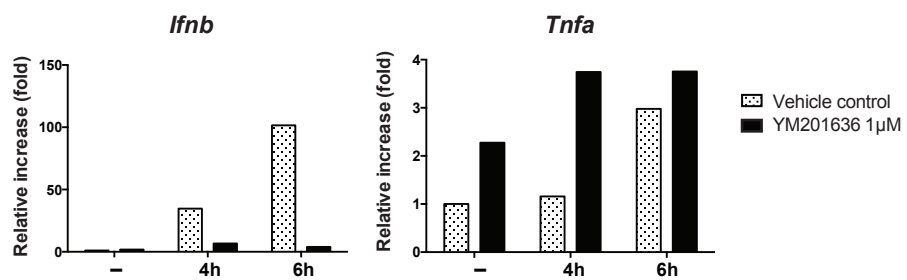

Figure S4

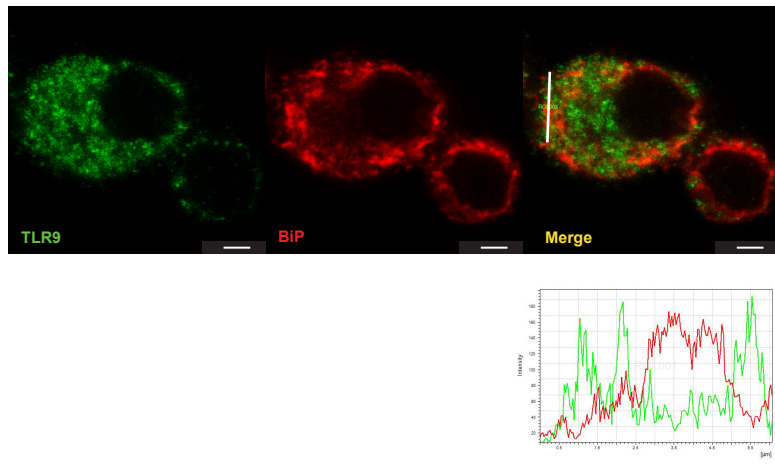

Supplement: supp_dxv021_Supplementary_figures.pdf [file supp_dxv021_Supplementary_figures.pdf]
